# Supplementary material
Source: HighWire-hosted journal article supplement (https://erj.ersjournals.com/content/58/2/2100996)

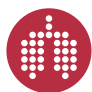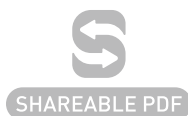

# Cardiopulmonary exercise capacity and limitations 3 months after COVID-19 hospitalisation

Ingunn Skjørten<sup>1</sup>, Odd Andre Wathne Ankerstjerne<sup>1</sup>, Divna Trebinjac<sup>1</sup>, Eivind Brønstad<sup>2,3</sup>, Øystein Rasch-Halvorsen<sup>2,3</sup>, Gunnar Einvik<sup>4,5</sup>, Tøri Vigeland Lerum<sup>6</sup>, Knut Stavem<sup>4,5,7</sup>, Anne Edvardsen<sup>4</sup> and Charlotte Björk Ingul<sup>1,2,8</sup>

<sup>1</sup>LHL Hospital Gardermoen, Jessheim, Norway. <sup>2</sup>Dept of Circulation and Medical Imaging, Norwegian University of Science and Technology, Trondheim, Norway. <sup>3</sup>Thoracic Dept, St Olavs University Hospital, Trondheim, Norway. <sup>4</sup>Pulmonary Dept, Akershus University Hospital, Lørenskog, Norway. <sup>5</sup>Institute for Clinical Medicine, University of Oslo, Oslo, Norway. <sup>6</sup>Dept of Pulmonary Medicine, Oslo University Hospital Ullevål, Oslo, Norway. <sup>7</sup>Health Services Research Unit, Akershus University Hospital, Lørenskog, Norway. <sup>8</sup>Faculty of Nursing and Health Sciences, Nord University, Bodø, Norway.

Corresponding author: Charlotte Björk Ingul ([charlotte.b.ingul@ntnu.no](mailto:charlotte.b.ingul@ntnu.no))

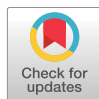

Shareable abstract (@ERSpublications)

Oxygen uptake was reduced in one-third of participants 3 months after hospitalisation for COVID-19. The most common exercise limitation was deconditioning. Circulatory limitations to exercise were more common than ventilatory limitations. <https://bit.ly/3jmVDQ6>

**Cite this article as:** Skjørten I, Ankerstjerne OAW, Trebinjac D, *et al.* Cardiopulmonary exercise capacity and limitations 3 months after COVID-19 hospitalisation. *Eur Respir J* 2021; 58: 2100996 [DOI: 10.1183/13993003.00996-2021].

This single-page version can be shared freely online.

Copyright ©The authors 2021.

This version is distributed under the terms of the Creative Commons Attribution Non-Commercial Licence 4.0. For commercial reproduction rights and permissions contact [permissions@ersnet.org](mailto:permissions@ersnet.org)

This article has an editorial commentary:  
<https://doi.org/10.1183/13993003.01763-2021>

Received: 5 April 2021  
Accepted: 21 June 2021

## Abstract

**Background** This study aimed to describe cardiopulmonary function during exercise 3 months after hospital discharge for COVID-19 and compare groups according to dyspnoea and intensive care unit (ICU) stay.

**Methods** Participants with COVID-19 discharged from five large Norwegian hospitals were consecutively invited to a multicentre, prospective cohort study. In total, 156 participants (mean age 56.2 years, 60 females) were examined with a cardiopulmonary exercise test (CPET) 3 months after discharge and compared with a reference population. Dyspnoea was assessed using the modified Medical Research Council (mMRC) dyspnoea scale.

**Results** Peak oxygen uptake ( $V'_{O_{2peak}}$ ) <80% predicted was observed in 31% (n=49). Ventilatory efficiency was reduced in 15% (n=24), while breathing reserve <15% was observed in 16% (n=25). Oxygen pulse <80% predicted was found in 18% (n=28). Dyspnoea (mMRC ≥1) was reported by 47% (n=59). These participants had similar  $V'_{O_{2peak}}$  (p=0.10) but lower mean±SD  $V'_{O_{2peak}} \cdot kg^{-1}$  % predicted compared with participants without dyspnoea (mMRC 0) (76±16% versus 89±18%; p=0.009) due to higher body mass index (p=0.03). For ICU- versus non-ICU-treated participants, mean±SD  $V'_{O_{2peak}}$  % predicted was 82±15% and 90±17% (p=0.004), respectively. Ventilation, breathing reserve and ventilatory efficiency were similar between the ICU and non-ICU groups.

**Conclusions** One-third of participants experienced  $V'_{O_{2peak}}$  <80% predicted 3 months after hospital discharge for COVID-19. Dyspnoeic participants were characterised by lower exercise capacity due to obesity and lower ventilatory efficiency. Ventilation and ventilatory efficiency were similar between ICU- and non-ICU-treated participants.

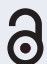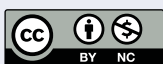

Supplement: inline-supplementary-material-1 [file inline-supplementary-material-1.pdf]
